# Supplementary material
Source: HighWire-hosted journal article supplement (https://qualitysafety.bmj.com/highwire/filestream/161620/field_highwire_adjunct_files/3/bmjqs-2021-013785supp004_data_supplement.pdf)
Supplement: bmjqs-2021-013785supp004_data_supplement.pdf [file bmjqs-2021-013785supp004_data_supplement.pdf]

**Supplementary File 4: Characteristics of hospitals (N=4) and wards (N=36)**

| <b>Characteristics</b> | <b>Control (n=18)</b>                            | <b>Intervention (n=18)</b>                       |
|------------------------|--------------------------------------------------|--------------------------------------------------|
| <b>Hospital A</b>      |                                                  |                                                  |
| Beds ~640              | Ward 1- 26 beds<br>Medical                       | Ward 1- 26 beds<br>Medical                       |
|                        | Ward 2- 24 beds<br>Surgical                      | Ward 2- 20 beds<br>Medical                       |
|                        | Ward 3- 22 beds<br>Surgical                      | Ward 3- 22 beds<br>Medical                       |
|                        | Ward 4- 26 beds<br>Specialty Medicine            | Ward 4- 26 beds<br>Specialty Medicine            |
|                        | Ward 5- 26 beds<br>Specialty Medicine            | Ward 5- 36 beds<br>Specialty Medicine & Surgical |
| <b>Hospital B</b>      |                                                  |                                                  |
| Beds ~550              | Ward 1- 46 beds<br>Specialty Medicine & Surgical | Ward 1- 46 beds<br>Surgical                      |
|                        | Ward 2- 32 beds<br>Medical                       | Ward 2- 36 beds<br>Surgical                      |
|                        | Ward 3- 29 beds<br>Surgical                      | Ward 3- 32 beds<br>Medical                       |
|                        | Ward 4- 34 beds<br>Medical                       | Ward 4- 28 beds<br>Specialty Medicine            |
|                        | Ward 5- 34 beds<br>Specialty Medicine            | Ward 5- 30 beds<br>Surgical                      |
| <b>Hospital C</b>      |                                                  |                                                  |
| Beds ~600              | Ward 1- 30 beds<br>Specialty Medicine            | Ward 1- 32 beds<br>Specialty Medicine            |
|                        | Ward 2- 32 beds<br>Medicine                      | Ward 2- 32 beds<br>Medicine                      |
|                        | Ward 3- 32 beds<br>Surgical                      | Ward 3- 32 beds<br>Surgical                      |
|                        | Ward 4- 28 beds<br>Specialty Medicine            | Ward 4- 28 beds<br>Surgical                      |
| <b>Hospital D</b>      |                                                  |                                                  |
| Beds ~520              | Ward 1- 28 beds<br>Surgical                      | Ward 1- 24 beds<br>Medical                       |
|                        | Ward 2- 20 beds<br>Medical                       | Ward 2- 20 beds<br>Surgical                      |
|                        | Ward 3- 30 beds<br>Surgical                      | Ward 3- 36 beds<br>Surgical                      |
|                        | Ward 4- 36 beds<br>Medical                       | Ward 4- 36 beds<br>Medical                       |
